# Supplementary material for: New insights from old bones: DNA preservation and degradation in permafrost preserved mammoth remains
Source: PubMed Central journal article supplement — Nucleic Acids Res. 2009 Mar 24;37(10):3215–29. doi: 10.1093/nar/gkp159 (PMC2691819; doi:10.1093/nar/gkp159), 2009-03-24
Supplement: gkp159_1.pdf [file gkp159_1.pdf]

## Results of the Principal Component Analyses

### Analysis 1: 11 variables, Figure 5A

#### Eigenanalysis of the Correlation Matrix

|                        |        |        |        |        |        |
|------------------------|--------|--------|--------|--------|--------|
| Eigenvalue             | 4.5089 | 2.1744 | 2.0650 | 1.5860 | 0.6657 |
| Proportion of variance | 0.410  | 0.198  | 0.188  | 0.144  | 0.061  |
| Cumulative variance    | 0.410  | 0.608  | 0.795  | 0.939  | 1.000  |

#### Calculations of the PC scores

| Variable            | PC1    | PC2    | PC3    | PC4    |
|---------------------|--------|--------|--------|--------|
| Lambda SN           | 0.299  | -0.401 | 0.147  | -0.351 |
| N SN                | -0.030 | -0.313 | -0.090 | 0.591  |
| Lambda PT           | 0.388  | -0.194 | -0.002 | -0.292 |
| N PT                | -0.220 | 0.456  | 0.112  | -0.142 |
| C>T rate SN         | 0.295  | -0.180 | -0.499 | 0.072  |
| C>T rate PT         | 0.413  | 0.170  | -0.131 | 0.261  |
| AA (ppm)            | -0.361 | 0.145  | -0.378 | -0.211 |
| D/L asp             | 0.247  | 0.036  | 0.586  | -0.084 |
| collagen            | -0.303 | -0.503 | -0.037 | 0.066  |
| crystallinity index | -0.311 | -0.353 | -0.028 | -0.424 |
| Thermal Age DNA     | -0.270 | -0.185 | 0.450  | 0.336  |

### Analysis 2: 7 variables, Figure 5B

#### Eigenanalysis of the Correlation Matrix

|                        |        |        |        |        |        |
|------------------------|--------|--------|--------|--------|--------|
| Eigenvalue             | 3.3801 | 1.7310 | 1.3701 | 0.4652 | 0.0536 |
| Proportion of variance | 0.483  | 0.247  | 0.196  | 0.066  | 0.008  |
| Cumulative variance    | 0.483  | 0.730  | 0.926  | 0.992  | 1.000  |

#### Calculations of the PC scores

| Variable            | PC1    | PC2    | PC3    | PC4    |
|---------------------|--------|--------|--------|--------|
| Total nDNA          | 0.476  | 0.291  | -0.234 | 0.127  |
| Total mtDNA         | 0.092  | -0.083 | 0.832  | -0.016 |
| AA (ppm)            | 0.473  | 0.138  | 0.355  | -0.106 |
| D/L asp             | -0.481 | -0.262 | -0.037 | -0.455 |
| collagen            | 0.382  | -0.452 | -0.321 | 0.159  |
| crystallinity index | 0.404  | -0.323 | -0.079 | -0.742 |
| Thermal Age DNA     | 0.027  | -0.715 | 0.129  | 0.435  |
