# Supplementary material for: New insights from old bones: DNA preservation and degradation in permafrost preserved mammoth remains
Source: PubMed Central journal article supplement — Nucleic Acids Res. 2009 Mar 24;37(10):3215–29. doi: 10.1093/nar/gkp159 (PMC2691819; doi:10.1093/nar/gkp159), 2009-03-24
Supplement: gkp159_2.pdf [file gkp159_2.pdf]

L. africana, CytB, D84151

ATGTCCTCCCGTGAGGCAAAATATCATTCTGAGGGGCCACAGTAATCACTAACCTTTTCTCAGCAATCCCTTGATCGGCCAAACCCTAGTAGAATGAATCTGAGGAGGCTTTTCAGTAGATAAAGCAAC

Human, CytB, AF254896

ATGTCCTCCCGTGAGGCAAAATATCATTCTGAGGGGCCACAGTAATCACTAACCTTTTCTCAGCAATCCCTTGATCGGCCAAACCCTAGTAGAATGAATCTGAGGAGGCTACTCAGTAGACAGTCCCAC

Human, CytB, AY714008

ATGTCCTCCCGTGAGGCAAAATATCATTCTGAGGGGCCACAGTAATCACTAACCTTTTCTCAGCAATCCCTTGATCGGCCAAACCCTAGTAGAATGAATCTGAGGAGGCTACTCAGTAGACAGTCCCAC

400 410 420 430 440 450 460 470 480 490 500 510 520

Consensus Ber12

CTTAAATCGATTCTTCGCCCTCCATTTTATTCTCCATTTACTATAAATGGCACTAGCAGGAGTACACCTAACCTTCTTTCACGAAACAGGCTCAAATAATCCACTAGGCCCTCAGTTCAGACTCAGACAAA

Consensus 473

CTTAAATCGATTCTTCGCCCTCCATTTTATTCTTCCATTTACTATAAATGGCACTAGCAGGAGTACACCTAACCTTCTTTCACGAAACAGGCTCAAATAAACCCTAGGCCCTCAGTTCAGACTCAGACAAA

Consensus 173

CTTAAATCGATTCTTCGCCCTCCATTTTATTCTTCCATTTACTATAAATGGCACTAGCAGGAGTACACCTAACCTTCTTTCACGAAACAGGCTCAAATAAACCCTAGGCCCTCAGTTCAGACTCAGACAAA

Consensus 472

CTTAAATCGATTCTTCGCCCTCCATTTTATTCTTCCATTTACTATAAATGGCACTAGCAGGAGTACACCTAACCTTCTTTCACGAAACAGGCTCAAATAAACCCTAGGCCCTCAGTTCAGACTCAGACAAA

Consensus 917

CTTAAATCGATTCTTCGCCCTCCATTTTATTCTTCCATTTACTATAAATGGCACTAGCAGGAGTACACCTAACCTTCTTTCACGAAACAGGCTCAAATAAACCCTAGGCCCTCAGTTCAGACTCAGACAAA

Consensus 915

CTTAAATCGATTCTTCGCCCTCCATTTTATTCTTCCATTTACTATAAATGGCACTAGCAGGAGTACACCTAACCTTCTTTCACGAAACAGGCTCAAATAAACCCTAGGCCCTCAGTTCAGACTCAGACAAA

Consensus BMV

CTTAAACCGATTCTTCGCCCTCCATTTTATTCTTCCATTTACTATAAATGGCACTAGCAGGAGTGCACCTAACCTTCTTTCACGAAACAGGCTCAAATAAACCCTAGGTCCTCAGTTCAGACTCAGACAAA

M. primigenius, CytB, D50842

CTTAAATCGATTCTTCGCCCTCCATTTTATTCTTCCATTTACTATAAATGGCACTAGCAGGAGTACACCTAACCTTCTTTCACGAAACAGGCTCAAATAAACCCTAGGCCCTCAGTTCAGACTCAGACAAA

M. primigenius, CytB, D83047

CTTAAATCGATTCTTCGCCCTCCATTTTATTCTTCCATTTACTATAAATGGCACTAGCAGGAGTACACCTAACCTTCTTTCACGAAACAGGCTCAAATAAACCCTAGGCCCTCAGTTCAGACTCAGACAAA

M. primi., mt genome, AP008987

CTTAAATCGATTCTTCGCCCTCCATTTTATTCTTCCATTTACTATAAATGGCACTAGCAGGAGTACACCTAACCTTCTTTCACGAAACAGGCTCAAATAAACCCTAGGCCCTCAGTTCAGACTCAGACAAA

M. primi., mt genome, DQ188829

CTTAAATCGATTCTTCGCCCTCCATTTTATTCTTCCATTTACTATAAATGGCACTAGCAGGAGTACACCTAACCTTCTTTCACGAAACAGGCTCAAATAAACCCTAGGCCCTCAGTTCAGACTCAGACAAA

E. maximus, CytB, AB002412

CTTAAACCGATTCTTCGCCCTCCATTTTACTTCCATTTACTATAAATGGCACTAGCAGGAGTGCACCTAACCTTCTTTCACGAAACAGGCTCAAATAAACCCTAGGTCCTCAGTTCAGACTCAGACAAA

E. maximus, CytB, D83048

CTTAAACCGATTCTTCGCCCTCCATTTTACTTCCATTTACTATAAATGGCACTAGCAGGAGTGCACCTAACCTTCTTTCACGAAACAGGCTCAAATAAACCCTAGGTCCTCAGTTCAGACTCAGACAAA

E. maximus, CytB, D50846

CTTAAACCGATTCTTCGCCCTCCATTTTACTTCCATTTACTATAAATGGCACTAGCAGGAGTGCACCTAACCTTCTTTCACGAAACAGGCTCAAATAAACCCTAGGTCCTCAGTTCAGACTCAGACAAA

E. maximus, CytB, D50844

CTTAAACCGATTCTTCGCCCTCCATTTTACTTCCATTTACTATAAATGGCACTAGCAGGAGTGCACCTAACCTTCTTTCACGAAACAGGTCCAAACAACCCTAGGTCCTCAGTTCAGACTCAGACAAA

L. africana, CytB, AJ224821

CTTAAATCGATTCTTCGCCCTCCATTTTACTTCCATTTACTATAAATGGCACTAGCAGGAGTGCACCTAACCTTCTTTCACGAAACAGGTCCAAACAACCCTAGGTCCTCAGTTCAGACTCAGACAAA

L. africana, CytB, D84152

CTTAAATCGATTCTTCGCCCTCCATTTTACTTCCATTTACTATAAATGGCACTAGCAGGAGTGCACCTAACCTTCTTTCACGAAACAGGCTCAAACAACCCTAGGTCCTCAGTTCAGACTCAGACAAA

L. africana, CytB, D84151

CTTAAATCGATTCTTCGCCCTCCATTTTACTTCCATTTACTATAAATGGCACTAGCAGGAGTGCACCTAACCTTCTTTCACGAAACAGGCTCAAACAACCCTAGGTCCTCAGTTCAGACTCAGACAAA

Human, CytB, AF254896

CCTCACACGATTCTTTACCTTTCACCTTCATCTTGCCCTTCAATTATGCAGCCCTAGCAGCACTCCACCTCCTATTCTTGACGAAACGGGATCAAACAACCCTTAGGAATCACCTCCCATTCCGATAAAA

Human, CytB, AY714008

CCTCACACGATTCTTTACCTTTCACCTTCATCTTGCCCTTCAATTATGCAGCCCTAGCAGCACTCCACCTCCTATTCTTGACGAAACGGGATCAAACAACCCTTAGGAATCACCTCCCATTCCGATAAAA

530 540 550 560 570 580 590 600 610 620 630 640 650

Consensus Ber12

ATCCCCTTTCAACCGTACTATAACCATCAAAGACTTCCTAGGACTACTTATCCTAATCCTATTCCCTCYACTCTTAGCCCTACTATCTCCTGACATACTAGGAGACCCCGACAACTACATACCAGCTGATC

Consensus 473

ATCCCCTTTCAACCGTACTATAACCATCAAAGACTTCCTAGGACTACTTATCCTAATCCTATTCCCTCTACTCTTAGCCCTACTATCTCCTGACATACTAGGAGACCCCGACAACTACATACCAGCTGATC

Consensus 173

ATCCCCTTTCAACCGTACTATAACCATCAAAGACTTCCTAGGACTACTTATCCTAATCCTATTCCCTCTACTCTTAGCCCTACTATCTCCTGACATACTAGGAGACCCCGACAACTACATACCAGCTGATC

Consensus 472

ATCCCCTTTCAACCGTACTATAACCATCAAAGACTTCCTAGGACTACTTATCCTAATCCTATTCCCTCTACTCTTAGCCCTACTATCTCCTGACATACTAGGAGACCCCGACAACTACATACCAGCTGATC

Consensus 917

ATCCCCTTTCAACCGTACTATAACCATCAAAGACTTCCTAGGACTACTTATCCTAATCCTATTCCCTCTACTCTTAGCCCTACTATCTCCTGACATACTAGGAGACCCCGACAACTACATACCAGCTGATC

Consensus 915

ATCCCCTTTCAACCGTACTATAACCATCAAAGACTTCCTAGGACTACTTATCCTAATCCTATTCCCTCTACTCTTAGCCCTACTATCTCCTGACATACTAGGAGACCCCGACAACTACATACCAGCTGATC

Consensus BMV

ATCCCCTTTCAACCGTACTATAACCATCAAAGACTTCCTAGGACTACTTATCCTAATTTTACTCTTCTCCTTCTACTCTTAGCCCTACTATCTCCTGACATACTAGGAGACCCCGACAACTACATACCAGCTGATC

M. primigenius, CytB, D50842

ATCCCCTTTCAACCGTACTATAACCATCAAAGACTTCCTAGGACTACTTATCCTAATCCTATTCCCTCTACTCTTAGCCCTACTATCTCCTGACATACTAGGAGACCCCGACAACTACATACCAGCTGATC

M. primigenius, CytB, D83047

ATCCCCTTTCAACCGTACTATAACCATCAAAGACTTCCTAGGACTACTTATCCTAATCCTATTCCCTCTACTCTTAGCCCTACTATCTCCTGACATACTAGGAGACCCCGACAACTACATACCAGCTGATC

M. primi., mt genome, AP008987

ATCCCCTTTCAACCGTACTATAACCATCAAAGACTTCCTAGGACTACTTATCCTAATCCTATTCCCTCTACTCTTAGCCCTACTATCTCCTGACATACTAGGAGACCCCGACAACTACATACCAGCTGATC

M. primi., mt genome, DQ188829

ATCCCCTTTCAACCGTACTATAACCATCAAAGACTTCCTAGGACTACTTATCCTAATCCTATTCCCTCTACTCTTAGCCCTACTATCTCCTGACATACTAGGAGACCCCTGACAACTACATACCAGCTGATC

E. maximus, CytB, AB002412

ATCCCCTTTCAACCGTACTATAACTATCAAAGACTTCCTAGGACTACTTATCCTAATTTTACTCTTCTACTCTTAGCCCTACTATCTCCAGACATACTAGGAGACCCCTGACAACTACATACCAGCTGATC

E. maximus, CytB, D83048

ATCCCCTTTCAACCGTACTATAACTATCAAAGACTTCCTAGGACTACTTATCCTAATTTTACTCTTCTACTCTTAGCCCTACTATCTCCAGACATACTAGGAGACCCCGACAACTACATACCAGCTGATC

E. maximus, CytB, D50846

ATCCCCTTTCAACCGTACTATAACTATCAAAGACTTCCTAGGACTACTTATCCTAATTTTACTCTTCTACTCTTAGCCCTACTATCTCCAGACATACTAGGAGACCCCTGACAACTACATACCAGCTGATC

E. maximus, CytB, D50844

ATCCCCTTTCAACCGTACTATAACTATCAAAGACTTCCTAGGACTACTTATCCTAATTTTACTCTTCTACTCTTAGCCCTACTATCTCCAGACATACTAGGAGACCCCTGACAACTACATACCAGCTGATC

L. africana, CytB, AJ224821

ATCCCCTTTCAACCGTACTATAACTATCAAAGACTTCCTAGGACTACTTATCCTAATTTTACTCTTCTACTCTTAGCCCTACTATCTCCAGACATACTAGGAGACCCCTGACAACTACATACCAGCTGATC

L. africana, CytB, D84152

ATCCCCTTTCAACCGTACTATAACTATCAAAGACTTCCTAGGACTACTTATCCTAATTTTACTCTTCTACTCTTAGCCCTACTATCTCCAGACATACTAGGAGACCCCTGACAACTACATACCAGCTGATC

L. africana, CytB, D84151

ATCCCCTTTCAACCGTACTATAACTATCAAAGACTTCCTAGGACTACTTATCCTAATTTTACTCTTCTACTCTTAGCCCTACTATCTCCAGACATACTAGGAGACCCCTGACAACTACATACCAGCTGATC

Human, CytB, AF254896

ATCACCTTCCACCCCTACTACACAATCAAAGACGCCCTCGGCTTACTTCTCTTCTCTCTCTTAAATGACATTAACACTATTCTCACCCAGACCTCCTAGGCGACCCAGACAATTAACCTTAGCCAACC

Human, CytB, AY714008

ATCACCTTCCACCCCTACTACACAATCAAAGACGCCCTCGGCTTACTTCTCTTCTCTCTCTTAAATGACATTAACACTATTCTCACCCAGACCTCCTAGGCGACCCAGACAATTAACCTTAGCCAACC

660 670 680 690 700 710 720 730 740 750 760 770 780

Consensus Ber12

CACCTTAATACTCCCCTACACATCAAACCAGAGTGATACTTCTCTTTGCTTACGCCATCCTACGATCTGTACCAAAACAACTAGGAGGCGTCTTAGCCCTACTCCTATCAATCCTAATCCTTAGGAATTAT

Consensus 473

CACCTTAATACTCCCCTACACATCAAACCAGAGTGATACTTCTCTTTGCTTACGCCATCCTACGATCTGTACCAAAACAACTAGGAGGCGTCTTAGCCCTACTCCTATCAATCCTAATCCTTAGGAATTAT

Consensus 173

CACCTTAATACTCCCCTACACATCAAACCAGAGTGATACTTCTCTTTGCTTACGCCATCCTACGATCTGTACCAAAACAACTAGGAGGCGTCTTAGCCCTACTCCTATCAATCCTAATCCTTAGGAATTAT

Consensus 472

CACCTTAATACTCCCCTACACATCAAACCAGAGTGATACTTCTCTTTGCTTACGCCATCCTACGATCTGTACCAAAACAACTAGGAGGCGTCTTAGCCCTACTCCTATCAATCCTAATCCTTAGGAATTAT

Consensus 917

CACCTTAATACTCCCCTACACATCAAACCAGAGTGATACTTCTCTTTGCTTACGCCATCCTACGATCTGTACCAAAACAACTAGGAGGCGTCTTAGCCCTACTCCTATCAATCCTAATCCTTAGGAATTAT

Consensus 915

CACCTTAATACTCCCCTACACATCAAACCAGAGTGATACTTCTCTTTGCTTACGCCATCCTACGATCTGTACCAAAACAACTAGGAGGCGTCTTAGCCCTACTCCTATCAATCCTAATCCTTAGGAATTAT

Consensus BMV

CACTAAATACTCCCCTACACATCAAACCAGAGTGATACTTCTCTTTGCTTACGCCATCCTACGATCTGTACCAAAACAACTAGGAGGCGTCTTAGCCCTATTTCTATCAATCCTGATTTTAGGAATTAT

M. primigenius, CytB, D50842

CACCTTAATACTCCCCTACACATCAAACCAGAGTGATACTTCTCTTTGCTTACGCCATCCTACGATCTGTACCAAAACAACTAGGAGGCGTCTTAGCCCTACTCCTATCAATCCTAATCCTTAGGAATTAT

M. primigenius, CytB, D83047

CACCTTAATACTCCCCTACACATCAAACCAGAGTGATACTTCTCTTTGCTTACGCCATCCTACGATCTGTACCAAAACAACTAGGAGGCGTCTTAGCCCTACTCCTATCAATCCTAATCCTTAGGAATTAT

M. primi., mt genome, AP008987

CACCTTAATACTCCCCTACACATCAAACCAGAGTGATACTTCTCTTTGCTTACGCCATCCTACGATCTGTACCAAAACAACTAGGAGGCGTCTTAGCCCTACTCCTATCAATCCTAATCCTTAGGAATTAT

M. primi., mt genome, DQ188829

CACCTTAATACTCCCCTACACATCAAACCAGAGTGATACTTCTCTTTGCTTACGCCATCCTACGATCTGTACCAAAACAACTAGGAGGCGTCTTAGCCCTACTCCTATCAATCCTAATCCTTAGGAATTAT

E. maximus, CytB, AB002412

CACTAAATACTCCCCTACACATCAAACCAGAGTGATACTTCTCTTTGCTTACGCCATCCTACGATCTGTACCAAAACAACTAGGAGGCGTCTTAGCCCTATTTCTATCAATCCTGATTTTAGGAATTAT
