# Supplementary material for: New insights from old bones: DNA preservation and degradation in permafrost preserved mammoth remains
Source: PubMed Central journal article supplement — Nucleic Acids Res. 2009 Mar 24;37(10):3215–29. doi: 10.1093/nar/gkp159 (PMC2691819; doi:10.1093/nar/gkp159), 2009-03-24
Supplement: gkp159_3.pdf [file gkp159_3.pdf]

10 20 30 40 50 60 70 80 90 100 110 120 130  
Consensus Ber12 AGCCCCAGTCAGCGTCACCCACGCCGTATGTGGAGGACATCCCAGAGCCGCCCTGCATGACCTCTACTGCAGTAAACTGCTGGACCTGGCCTTCCCTGCTGGACGGCTCCTCCAAGCTGTCCGAGGCTGAG  
Consensus 473 AGCCCCAGTCAGCGTCACCCACGCCGTATRTGGAGGACATCCCARAGCCGCCCTGCATGACCTCTACTGCAG  
Consensus 173 AGCCCCAGTCAGCGTCACCCACGCCGTATGTGGAGGACATTcYAGAGCCGCCYYTGCATGACCTCTAYTGCAGTAAACTGCTGGACCTGGCCTTCCCTGCTGGACGGCTCCTCCAAGCTGTCCGAGGCTGAG  
Consensus 472 AGCCCCAGTCAGYGTACCCACGCCGTATGTGGAGGACATCCAGAGCCGCCCTGCATGACCTCTACTGCAGTAAACTGCTGGACCTGGCCTTCCCTGCTGGACGGCTCCTCCAAGCTGTCCGAGGCTGAG  
Consensus 917 AGCCCCAGTCAGCGTCACCCACGCCGTATGTGGAGGACATCCCAGAGCCGCCCTGCATGACCTCTACTGCAG  
Consensus 915 AGCCCCAGTCAGCGTCACCCACGCCGTATGTGGAGGACATCtCAGAGCCGCCCTGCATGACCTCTACTGCAGTAAACTGCTGGACCTGGCCTTCCCTGCTGGACGGCTCCTCCAAGCTGTCCGAGGCTGAG  
Consensus BMV NGCCCNNNNAGNGTCACCCACGCCGTATGTGGAGGACATCTCAGAGCCGCCCTGCATGACCTCTACTGCAGTAAACTGCTGGACCTGGCCTTCCCTGCTGGACGGCTCCTCCAAGCTGTCCGAGGCTGAG

---  
M. primigenius, vWF, AF154874 ~GCCCCAGTCAGTGTACCCACGCCGTATGTGGAGGACATCTCAGAGCCGCCCTGCAG  
M. primigenius, vWF, AF154873 ~GCCCCAGTCAGCGTCACCCACGCCGTATGTGGAGGACATCTCAGAGCCGCCCTGCAG  
M. primigenius, vWF, AF154875 ~~~~~~  
E. maximus, vWF, resequenced AGCCCCAGTCAGCGTCACCCACGCCGTATGTGGAGGACATCTCAGAGCCGCCCTGCATGACCTCTACTGCAGTAAACTGCTGGACCTGGCCTTCCCTGCTGGACGGCTCCTCCAAGCTGTCCGAGGCTGAG  
E. maximus, vWF, U31611 AGCCCCAGTCAGCGTCACCCACGCCTTTTGTGGAGGACATCTCAGAGCCGCCCTGSATGACCTCTACTGCAGTAAACTGCTGGACCTGGCCTTCCCTGCTGGACGGCTCCTCCAAGCTGTCCGAGGCTGAG  
L. africana, vWF, resequenced AGCCCCAGTCAGCGTCACCCACGCCGTATGTGGAGGACATCTCAGAGCCGCCCTGCATGACCTCTACTGCAGTAAACTGCTGGACCTGGCCTTCCCTGCTGGACGGCTCCTCCAAGCTGTCCGAGGCTGAG  
L. africana, vWF, U31615 AGCCCCAGTCAGCGTCACCCACGCCATATGTGGAGGACATCTCAGAGCTGCCCTGCATGACCTCTACTGCAGTAAACTGCTGGACCTGGCCTTCCCTGCTGGACGGCTCCTCCAAGCTGTCCGAGGCTGAG

Human, vWF, NM\_000552 TGCCCCGGTGAGCCCCACCCTCTGTATGTGGAGGACATCTCGAAACCGCCGTTGCACGATTTCTACTGCAGCAGGCTACTGGACCTGGTCTTCCCTGCTGGATGGCTCCTCCAGGCTGTCCGAGGCTGAG  
.....  
140 150 160 170 180 190 200 210 220 230 240 250 260  
TTTGATGTGCTAAAGGTCTTTGTGGTGGACATGATGGAGCGGCTGCACATCTCCAGAAGCGGATCCGTGTGGCCGTGGTGGAGTACTACGATGGCTCGCACTCCTACATCGACCTCAGGGACAGGAAGC

Consensus Ber12 TTTGATGTGCTAAAGG  
Consensus 473 TTTGATGTGCTAAAGG  
Consensus 173 TTTGATGTGCTAAAGG  
Consensus 472 TTTGATGTGCTAAAGG  
Consensus 917 TTTGATGTGCTAAAGG  
Consensus 915 TTTGATGTGCTAAAGGTCTTTGTGGTGGACATGATGGAGCGGCTGCACATCTNCCAGAAGCGGATCCGTGTGGCCGTGGTGGAGTACCACGATGGCTCGCACTCCTACATCGACCTCAGGGACAGGAAGC  
Consensus BMV TTTGATGTGCTAAAGGTCTTTGTGGTGGACATGATGGAGCGGCTGCACATCTCCAGAAGCGGATCCGTGTGGCCGTGGTGGAGTACCACGATGGCTCGCACTCCTACATCGACCTCAGGGACAGGAAGC

---  
M. primigenius, vWF, AF154874 TTTGATGTGCTAAAGGTCTTTGTGGTGGACATGATGGAGCGGCTGCACATCTCCAGAAGCGGATCCGTGTGGCCGTGGTGGAGTACCACGATGGCTCGCACTCCTACATCGACCTCAGGGACAGGAAGC  
M. primigenius, vWF, AF154873 TTTGATGTGCTAAAGGTCTTTGTGGTGGACATGATGGAGCGGCTGCACATCTCCAGAAGCGGATCCGTGTGGCCGTGGTGGAGTACCACGATGGCTCGCACTCCTACATCGACCTCAGGGACAGGAAGC  
M. primigenius, vWF, AF154875 TTTGATGTGCTAAAGGTCTTTGTGGTGGACATGATGGAGCGGCTGCACATCTCCAGAAGCGGATCCGTGTGGCCGTGGTGGAGTACCACGATGGCTCGCACTCCTACATCGACCTCAGGGACAGGAAGC  
E. maximus, vWF, resequenced TTTGATGTGCTAAAGGTCTTTGTGGTGGACATGATGGAGCGGCTGCACATCTCCAGAAGCGGATCCGTGTGGCCGTGGTGGAGTACCACGATGGCTCGCACTCCTACATCGACCTCAGGGACAGGAAGC  
E. maximus, vWF, U31611 TTTGATGTGCTAAAGGTCTTTGTGGTGGACATGATGGAGCGGCTGCACATCTCCAGAAGCGGATCCGTGTGGCCGTGGTGGAGTACCACGATGGCTCGCACTCCTACATCGACCTCAGGGACAGGAAGC  
L. africana, vWF, resequenced TTTGATGTGCTAAAGGTCTTTGTGGTGGACATGATGGAGCGGCTGCACATCTCCAGAAGCGGATCCGTGTGGCCGTGGTGGAGTACCACGATGGCTCGCACTCCTACATCGACCTCAGGGACAGGAAGC  
L. africana, vWF, U31615 TTTGATGTGCTAAAGGTCTTTGTGGTGGACATGATGGAGCGGCTGCACATCTCCAGAAGCGGATCCGTGTGGCCGTGGTGGAGTACCACGATGGCTCGCACTCCTACATCGACCTCAGGGACAGGAAGC

Human, vWF, NM\_000552 TTTGAAGTGTGCTAAAGGCTTTGTGGTGGACATGATGGAGCGGCTGCACATCTCCAGAAGTGGTCCGCTGGCCGTGGTGGAGTACCACGACGGCTCCACGCCCTACATCGGGCTCAAGGACCGGAAGC  
.....  
270 280 290 300 310 320 330 340 350 360 370 380 390  
AGCCTTCGAGCTGCGGCGCATCNNTNGTCANGTGAAGTACGCAGGACGCCNNGTGGCC

Consensus Ber12 AGCCTTCGAGCTGCGGCGCATCNNTNGTCANGTGAAGTACGCAGGACGCCNNGTGGCC  
Consensus 473  
Consensus 173  
Consensus 472  
Consensus 917  
Consensus 915 AGCCTTCAGAGCTGCGGNGCATCGNTGGTTCAGGTGAAGTACGCAGGACGCCNNGTGGCC  
Consensus BMV AGCCTTCAGAGCTGCGGCGCATGNTGGTTCAGGTGAAGTACGCAGGACGCCAGGTGGCCTCCACCCTGAGGTCTTGAAGTACACGTTGTTCCAAATCTTTGGCAAGGCCGATCGCCAGAGCCTCCCG

---  
M. primigenius, vWF, AF154874 AGCCTTCAGAGCTGCGGCGCATCGTGGTTCAGGTGAAGTACGCAGGACGCCAGGTGGCCTCCACCCTGAGGTCTTGAAGTACACGTTGTTCCAAATCTTTGGCAAGGCCGATCGCCAGAGCCTCCCG  
M. primigenius, vWF, AF154873 AGCCTTCAGAGCTGCGGCGCATCGTGGTTCAGGTGAAGTACGCAGGACGCCAGGTGGCCTCCACCCTGAGGTCTTGAAGTACACGTTGTTCCAAATCTTTGGCAAGGCCGATCGCCAGAGCCTCCCG  
M. primigenius, vWF, AF154875 AGCCTTCAGAGCTGCGGCGCATCGTGGTTCAGGTGAAGTACGCAGGACGCCAGGTGGCCTCCACCCTGAGGTCTTGAAGTACACGTTGTTCCAAATCTTTGGCAAGGCCGATCGCCAGAGCCTCCCG  
E. maximus, vWF, resequenced AGCCTTCAGAGCTGCGGCGCATCGTGGTTCAGGTGAAGTACGCAGGACGCCAGGTGGCCTCCACCCTGAGGTCTTGAAGTACACGTTGTTCCAAATCTTTGGCAAGGCCGATCGCCAGAGCCTCCCG  
E. maximus, vWF, U31611 AGCCTTCAGAGCTGCGGCGCATCGTGGTTCAGGTGAAGTATCAGGACGCCAGGTGGCCTCCACCCTGAGGTCTTGAAGTACACGTTGTTCCAAATCTTTGGCAAGGCCGATCGCCAGAGCCTCCCG  
L. africana, vWF, resequenced AGCCTTCAGAGCTGCGGCGCATCGTGGTTCAGGTGAAGTATCAGGACGCCAGGTGGCCTCCACCCTGAGGTCTTGAAGTACACGTTGTTCCAAATCTTTGGCAAGGCCGATCGCCAGAGCCTCCCG  
L. africana, vWF, U31615 AGCCTTCAGAGCTGCGGCGCATCGTGGTTCAGGTGAAGTATCAGGACGCCAGGTGGCCTCCACCCTGAGGTCTTGAAGTACACGTTGTTCCAAATCTTTGGCAAGGCCGATCGCCAGAGCCTCCCG

Human, vWF, NM\_000552 GACCGTCAGAGCTGCGGCGCATCGCAGCCAGGTGAAGTATCGGGCAGCCAGGTGGCCTCCACCAGCGAGGTCTTGAAGTACACACTGTTCCAAATCTTTCAGCAAGATCGACCGCCTGAAGCCTCCCG  
.....  
400 410 420 430 440 450 460 470 480 490 500 510 520

Consensus Ber12 TATTGCCCTGCTCCTGACAGCCAGTGAAGAGCCCCACGGATGGCCCGGAACCTTGGCCCGATATGTGCAGGGCCTGAAGAAGAAGGTTATTGTGATCCGGTGGGCATTGGACCTCATGCCAGCCTC  
Consensus 473  
Consensus 173  
Consensus 472  
Consensus 917  
Consensus 915  
Consensus BMV TATTGCCCTGCTCCTGACAGCCAGTGAAGAGCCCCACGGATGGCCCGGAACCTTGGCCCGATATGTGCAGGGCCTGAAGAAGAAGGTTATTGTGATCCGGTGGGCATTGGACCTCATGCCAGCCTC

```

M. primigenius, vWF, AF154874
M. primigenius, vWF, AF154873
M. primigenius, vWF, AF154875
E. maximus, vWF, resequenced
E. maximus, vWF, U31611
L. africana, vWF, resequenced
L. africana, vWF, U31615
----
Human, vWF, NM_000552

      530      540      550      560      570      580      590
.....|.....|.....|.....|.....|.....|.....|.....|.....|.....|.....|.....|.....|.....
-----
Consensus Ber12
Consensus 473
Consensus 173
Consensus 472
Consensus 917
Consensus 915
Consensus BMV
AAGCAGGTCCGCCTTATCGAGAAGCAGGCCCTGAGAACAAAGCCTTTGTGCTTAGCAGCGTGACGAGCTGN
-----
M. primigenius, vWF, AF154874
M. primigenius, vWF, AF154873
M. primigenius, vWF, AF154875
E. maximus, vWF, resequenced
E. maximus, vWF, U31611
L. africana, vWF, resequenced
L. africana, vWF, U31615
----
Human, vWF, NM_000552
AAGCAGATCCGCCTCATCGAGAAGCAGGCCCTGAGAACAAAGCCTTCGTGCTGAGCAGTGTGGATGAGCTGG

```
